# Supplementary material for: Scallop protein with endogenous high taurine and glycine content prevents high-fat, high-sucrose-induced obesity and improves plasma lipid profile in male C57BL/6J mice
Source: PubMed Central journal article supplement (PMC4055845; doi:10.1007/s00726-014-1715-1), 2014-03-23
Supplement: 726_2014_1715_MOESM1_ESM.pdf [file 726_2014_1715_MOESM1_ESM.pdf]

**Article title**

Scallop protein with endogenous high taurine and glycine content prevents high fat, high sucrose-induced obesity and improves plasma lipid profile in male C57BL/6J mice

**Journal name**

Amino Acids

**Author names**

Hanne Sørup Tastesen<sup>1,2</sup>, Alison H. Keenan<sup>3</sup>, Lise Madsen<sup>1,2</sup>, Karsten Kristiansen<sup>1</sup> and Bjørn Liaset<sup>2</sup>

**Author affiliations**

<sup>1</sup> University of Copenhagen, Department of Biology, Ole Maaløes Vej 5, 2200 Copenhagen, Denmark

<sup>2</sup> National Institute of Nutrition and Seafood Research, Postbox 2029 Nordnes, 5817 Bergen, Norway

<sup>3</sup> Massachusetts General Hospital, Center for Computational and Integrative Biology, 185 Cambridge Street, Boston, MA 02114, USA

**Corresponding authors**

Bjørn Liaset; Bjorn.Liaset@nifes.no

Karsten Kristiansen; Karsten.Kristiansen@bio.ku.dk

**Supplemental Table 1** Composition of fatty acids in the diets

| (g/kg)               | LF     | Chicken | Cod    | Crab   | Scallop |
|----------------------|--------|---------|--------|--------|---------|
| 10:0                 | < 0.01 | 0.20    | 0.10   | 0.10   | 0.10    |
| 12:0                 | < 0.01 | 0.20    | 0.10   | 0.10   | 0.10    |
| 14:0                 | 0.20   | 2.85    | 2.75   | 2.75   | 2.70    |
| 15:0                 | < 0.01 | 0.20    | 0.20   | 0.20   | 0.20    |
| 16:0                 | 6.00   | 68.05   | 66.10  | 65.40  | 64.65   |
| 17:0                 | 0.10   | 0.95    | 0.90   | 0.90   | 0.90    |
| 18:0                 | 2.85   | 29.90   | 28.75  | 28.40  | 28.20   |
| 20:0                 | 0.10   | 0.70    | 0.80   | 0.75   | 0.85    |
| 22:0                 | 0.10   | 0.15    | 0.30   | 0.15   | 0.30    |
| 14:1n-9              | < 0.01 | 0.15    | 0.10   | 0.10   | 0.10    |
| 16:1n-7              | 0.32   | 4.23    | 4.10   | 4.25   | 4.23    |
| 16:1n-9              | 0.10   | 0.70    | 0.60   | 0.70   | 0.70    |
| 18:1n-7              | 0.70   | 6.20    | 5.85   | 6.05   | 5.95    |
| 18:1n-9              | 10.70  | 132.70  | 127.25 | 126.75 | 125.15  |
| 20:1n-9              | 0.10   | 1.60    | 1.45   | 1.50   | 1.65    |
| 18:2n-6              | 16.10  | 125.05  | 121.40 | 120.25 | 119.00  |
| 20:2n-6              | 0.10   | 0.75    | 0.85   | 0.90   | 1.00    |
| 18:3n-3              | 1.90   | 2.95    | 2.75   | 2.70   | 2.60    |
| 20:3n-3              | < 0.01 | 0.20    | 0.15   | 0.15   | 0.15    |
| 20:3n-6              | < 0.01 | < 0.01  | < 0.01 | 0.10   | < 0.01  |
| 16:4n-3              | < 0.01 | < 0.01  | 0.45   | 0.20   | < 0.01  |
| 20:4n-6              | 0.10   | 0.65    | 0.55   | 0.65   | 0.60    |
| 22:4n-6              | < 0.01 | 0.15    | 0.10   | < 0.01 | 0.10    |
| 20:5n-3 <sup>a</sup> | < 0.01 | < 0.01  | 0.85   | 1.40   | 1.35    |
| 22:5n-3              | < 0.01 | < 0.01  | < 0.01 | < 0.01 | 0.10    |
| 22:6n-3 <sup>b</sup> | < 0.01 | < 0.01  | 1.85   | 0.95   | 0.90    |

<sup>a</sup> eicosapentaenoic acid<sup>b</sup> docosahexaenoic acid
