# Supplementary material for: Scallop protein with endogenous high taurine and glycine content prevents high-fat, high-sucrose-induced obesity and improves plasma lipid profile in male C57BL/6J mice
Source: PubMed Central journal article supplement (PMC4055845; doi:10.1007/s00726-014-1715-1), 2014-03-23
Supplement: 726_2014_1715_MOESM2_ESM.pdf [file 726_2014_1715_MOESM2_ESM.pdf]

**Article title**

Scallop protein with endogenous high taurine and glycine content prevents high fat, high sucrose-induced obesity and improves plasma lipid profile in male C57BL/6J mice

**Journal name**

Amino Acids

**Author names**

Hanne Sørup Tastesen<sup>1,2</sup>, Alison H. Keenan<sup>3</sup>, Lise Madsen<sup>1,2</sup>, Karsten Kristiansen<sup>1</sup> and Bjørn Liaset<sup>2</sup>

**Author affiliations**

<sup>1</sup> University of Copenhagen, Department of Biology, Ole Maaløes Vej 5, 2200 Copenhagen, Denmark

<sup>2</sup> National Institute of Nutrition and Seafood Research, Postbox 2029 Nordnes, 5817 Bergen, Norway

<sup>3</sup> Massachusetts General Hospital, Center for Computational and Integrative Biology, 185 Cambridge Street, Boston, MA 02114, USA

**Corresponding authors**

Bjørn Liaset; Bjorn.Liaset@nifes.no

Karsten Kristiansen; Karsten.Kristiansen@bio.ku.dk

**Supplemental Table 2** Measured plasma metabolites and calculated HOMA-IR and QUICKI scores

|                            | State             | LF           | Chicken                   | Cod                       | Crab                      | Scallop                  | P-value |
|----------------------------|-------------------|--------------|---------------------------|---------------------------|---------------------------|--------------------------|---------|
| TAG (mmol/l)               | <i>Fasted</i>     | 1.58 ± 0.11  | <sup>A</sup> 1.34 ± 0.08  | <sup>A</sup> 1.33 ± 0.08  | <sup>AB</sup> 1.19 ± 0.09 | <sup>B</sup> 0.89 ± 0.10 | 0.004   |
|                            | <i>Non-fasted</i> | 0.91 ± 0.13  | 1.27 ± 0.13               | 1.58 ± 0.20               | 1.22 ± 0.19               | 0.91 ± 0.11              | 0.057   |
| NEFA (mmol/l)              | <i>Fasted</i>     | 0.78 ± 0.04  | <sup>A</sup> 0.82 ± 0.05  | <sup>A</sup> 0.74 ± 0.03  | <sup>AB</sup> 0.69 ± 0.04 | <sup>B</sup> 0.55 ± 0.05 | 0.001   |
|                            | <i>Non-fasted</i> | 0.26 ± 0.03  | 0.26 ± 0.03               | 0.29 ± 0.04               | 0.29 ± 0.03               | 0.32 ± 0.04              | 0.335   |
| Glycerol (mmol/l)          | <i>Fasted</i>     | 0.43 ± 0.04  | <sup>A</sup> 0.48 ± 0.02  | <sup>A</sup> 0.46 ± 0.03  | <sup>A</sup> 0.43 ± 0.02  | <sup>B</sup> 0.31 ± 0.01 | 0.001   |
|                            | <i>Non-fasted</i> | 0.28 ± 0.02  | 0.29 ± 0.02               | 0.33 ± 0.02               | 0.30 ± 0.02               | 0.27 ± 0.01              | 0.323   |
| OH-butyrate (mmol/l)       | <i>Fasted</i>     | 3.57 ± 0.29  | <sup>A</sup> 3.76 ± 0.21  | <sup>A</sup> 3.78 ± 0.26  | <sup>AB</sup> 3.27 ± 0.18 | <sup>B</sup> 2.50 ± 0.19 | 0.001   |
|                            | <i>Non-fasted</i> | 0.13 ± 0.02  | 0.27 ± 0.05               | 0.29 ± 0.16               | 0.28 ± 0.09               | 0.30 ± 0.05              | 0.260   |
| Total cholesterol (mmol/l) | <i>Fasted</i>     | 3.09 ± 0.16  | 3.06 ± 0.09               | 3.07 ± 0.10               | 3.07 ± 0.16               | 2.70 ± 0.06              | 0.066   |
|                            | <i>Non-fasted</i> | 3.54 ± 0.16  | <sup>A</sup> 4.43 ± 0.23  | <sup>A</sup> 4.59 ± 0.27  | <sup>AB</sup> 4.18 ± 0.19 | <sup>B</sup> 3.72 ± 0.09 | 0.015   |
| LDL-cholesterol (mmol/l)   | <i>Fasted</i>     | 0.57 ± 0.04  | 0.56 ± 0.04               | 0.53 ± 0.02               | 0.60 ± 0.07               | 0.45 ± 0.02              | 0.119   |
|                            | <i>Non-fasted</i> | 0.63 ± 0.04  | 0.81 ± 0.06               | 0.78 ± 0.06               | 0.72 ± 0.05               | 0.66 ± 0.03              | 0.086   |
| HDL-cholesterol (mmol/l)   | <i>Fasted</i>     | 2.25 ± 0.10  | 2.22 ± 0.06               | 2.20 ± 0.09               | 2.13 ± 0.11               | 2.16 ± 0.04              | 0.880   |
|                            | <i>Non-fasted</i> | 2.25 ± 0.07  | 2.45 ± 0.08               | 2.50 ± 0.07               | 2.50 ± 0.06               | 2.55 ± 0.06              | 0.944   |
| HDL/total cholesterol      | <i>Fasted</i>     | 0.73 ± 0.02  | <sup>AB</sup> 0.73 ± 0.02 | <sup>AB</sup> 0.72 ± 0.02 | <sup>B</sup> 0.70 ± 0.04  | <sup>A</sup> 0.80 ± 0.02 | 0.044   |
|                            | <i>Non-fasted</i> | 0.64 ± 0.02  | <sup>B</sup> 0.56 ± 0.02  | <sup>B</sup> 0.56 ± 0.03  | <sup>AB</sup> 0.60 ± 0.02 | <sup>A</sup> 0.69 ± 0.01 | 0.001   |
| ALAT (U/l)                 | <i>Fasted</i>     | 23.33 ± 2.87 | 31.86 ± 4.86              | 29.00 ± 3.25              | 28.00 ± 3.64              | 20.71 ± 1.11             | 0.175   |
|                            | <i>Non-fasted</i> | 27.75 ± 3.60 | 21.50 ± 1.05              | 25.00 ± 2.67              | 18.75 ± 1.26              | 19.50 ± 2.13             | 0.064   |
| Lactate (mmol/l)           | <i>Fasted</i>     | 1.53 ± 0.03  | 1.94 ± 0.11               | 1.70 ± 0.10               | 2.25 ± 0.23               | 2.13 ± 0.11              | 0.062   |
|                            | <i>Non-fasted</i> | 4.27 ± 0.42  | 3.80 ± 0.44               | 4.01 ± 0.40               | 3.95 ± 0.39               | 3.47 ± 0.29              | 0.866   |
| Total bile acids (µmol/l)  | <i>Fasted</i>     | 2.20 ± 0.52  | 1.77 ± 0.42               | 1.45 ± 0.22               | 1.60 ± 0.39               | 2.73 ± 0.68              | 0.202   |
|                            | <i>Non-fasted</i> | 3.86 ± 0.48  | 1.30 ± 0.44               | 1.71 ± 0.35               | 1.49 ± 0.40               | 2.16 ± 0.33              | 0.381   |
| Glucose (mmol/l)           | <i>Fasted</i>     | 6.52 ± 0.51  | 9.63 ± 0.52               | 8.96 ± 0.53               | 9.07 ± 0.72               | 10.18 ± 0.91             | 0.566   |
|                            | <i>Non-fasted</i> | 16.32 ± 0.78 | 16.17 ± 0.44              | 16.46 ± 0.90              | 14.80 ± 0.61              | 16.55 ± 0.40             | 0.214   |
| Insulin (pmol/l)           | <i>Fasted</i>     | 15.12 ± 6.54 | 19.95 ± 4.80              | 23.75 ± 4.34              | 37.47 ± 6.60              | 20.78 ± 5.35             | 0.101   |
| HOMA-IR                    | <i>Fasted</i>     | 0.91 ± 0.23  | 1.46 ± 0.29               | 1.61 ± 0.26               | 2.19 ± 0.40               | 1.41 ± 0.42              | 0.459   |
| QUICKI                     | <i>Fasted</i>     | 0.43 ± 0.02  | 0.37 ± 0.01               | 0.37 ± 0.01               | 0.36 ± 0.02               | 0.39 ± 0.02              | 0.658   |

Data represent group means (n=6-8) ± standard error. Data was analysed by one-way analysis of variance followed by Tukey's pairwise comparisons. Means that do not share a letter are significantly different (P<0.05). HOMA-IR: Homeostasis Model of Assessment-Insulin Resistance, QUICKI: Quantitative Insulin Sensitivity Check Index.
